# Supplementary material for: Toxicity of hydraulic fracturing wastewater from black shale natural-gas wells influenced by well maturity and chemical additives
Source: Royal Society of Chemistry journal article supplement (doi:10.1039/d1em00023c), 2021-01-01
Supplement: d1em00023c1.pdf [file d1em00023c1.pdf]

**Supporting Information for:**

**Toxicity of Hydraulic Fracturing Wastewater from Black Shale Natural-Gas Wells  
Influenced by Well Maturity and Chemical Additives**

Mina Aghababaei<sup>1</sup>, Jenna L Luek<sup>1</sup>, Paul F Ziemkiewicz<sup>2</sup>, Paula J Mouser<sup>1\*</sup>

**Affiliations:**

<sup>1</sup>Department of Civil and Environmental Engineering, University of New Hampshire, Durham, NH 03824, United States

<sup>2</sup>West Virginia Water Research Institute, West Virginia University, Morgantown, WV 26506, United States

**\*Corresponding author:** Paula J. Mouser

Phone: 603-862-3275

E-mail: Paula.Mouser@unh.edu.

Corresponding author address: University of New Hampshire, 35 Colovos Road, Durham, NH 03824

**This Supporting Information contains the following:**

Major ion concentrations (mg/L) of salt matched control (Table S1), Bioluminescence inhibition assay data (Table S2), NAC-thiol reactivity assay data (Table S3), Hydraulic fracturing fluid composition details for M-4 and M-5 wells in Marcellus Shale and U-6 and U-7 wells in the Utica-Point Pleasant Formation (Table S4-S7), organic chemistry data (Table S8) and iodinated organic ions data (Table S9); Experimental factors (Figure S1) and Organic chemistry trends (Figure S2)

## I. Supporting Tables

**Table S1.** Major ion concentrations (mg/L) of salt matched control that mimicked the chemistry of Appalachian shale FPW.

| <b>Constituents</b> | <b>Measured Conc. (mg/L)</b> |
|---------------------|------------------------------|
| Ca <sup>+2</sup>    | 8000                         |
| Mg <sup>+2</sup>    | 748.75                       |
| Na <sup>+</sup>     | 20185                        |
| K <sup>+</sup>      | 660                          |
| Cl <sup>-</sup>     | 48113                        |

**Table S2.** Bioluminescence Inhibition Assay Data

| Type of sample                  | Well # | Approximate Time After Flowback Began (Days) | Sampling Date | Days after Fracturing | TDS (ppt) | DOC (mg/L) | Dilution Factor | pH    | BLIA Inhibitory Effect (S) | BLIA Inhibitory Effect (SF) | TU <sub>50</sub> |
|---------------------------------|--------|----------------------------------------------|---------------|-----------------------|-----------|------------|-----------------|-------|----------------------------|-----------------------------|------------------|
| <b>MARCELLUS SHALE</b>          |        |                                              |               |                       |           |            |                 |       |                            |                             |                  |
| M-4 fracture fluid (Kill fluid) | M-4    | NA                                           | 3/3/2017      | NA                    | 19.1      | NA         | 1               | 9.22  | 89.14                      | 88.22                       | 51.28            |
| M-4 Drill mud                   | M-4    | NA                                           | 8/28/2015     | NA                    | 124.9     | NA         | 70              | 8.99  | 52.05                      | 52.49                       | 2.10             |
| M-4 Sidewall mud                | M-4    | NA                                           | 9/3/2015      | NA                    | 104.0     | NA         | 6               | 8.17  | 37.36                      | 44.86                       | 1.41             |
| M-4 FPW                         | M-4    | 2                                            | 12/11/2015    | 25                    | 17.50     | 312.2      | 4               | 6.4   | 5.25                       | 0.37                        | 0.030            |
| M-4 FPW                         | M-4    | 13                                           | 12/22/2015    | 36                    | 25.20     | 84.9       | 3               | 6.36  | 6.96                       | 5.34                        | 0.656            |
| M-4 FPW                         | M-4    | 56                                           | 2/3/2016      | 79                    | 55.30     | 98.5       | 5               | 5.99  | 8.06                       | 0.8                         | 0.006            |
| M-4 FPW                         | M-4    | 70                                           | 2/17/2016     | 93                    | 65.10     | 68.64      | 5               | 5.86  | 11.61                      | 16.18                       | 0.396            |
| M-4 FPW                         | M-4    | 182                                          | 6/8/2016      | 205                   | 143.50    | 59.67      | 5               | 6.35  | 6.73                       | 4.43                        | 0.002            |
| M-4 FPW                         | M-4    | 280                                          | 9/14/2016     | 303                   | 212.10    | 60.96      | 5               | 6.05  | 11.13                      | 5.35                        | 0.006            |
| M-4 FPW                         | M-4    | 406                                          | 1/18/2017     | 429                   | 300.30    | 416.15     | 6               | 5.42  | -11.15                     | -22.36                      | -                |
| M-4 FPW                         | M-4    | 490                                          | 4/12/2017     | 513                   | 359.10    | 104.1      | 6               | 5.22  | -15.78                     | -25.47                      | -                |
| M-4 FPW                         | M-4    | 641                                          | 8/16/2017     | 664                   | 464.80    | NA         | 6               | 5.28  | -17.21                     | -30.48                      | -                |
| M-4 FPW                         | M-4    | 764                                          | 12/13/2017    | 787                   | 550.90    | NA         | 6               | 5.39  | -24.98                     | -26.54                      | -                |
| M-5 FPW                         | M-5    | 2                                            | 12/11/2015    | 36                    | 25.20     | 68.91      | 3               | 6.3   | 33.61                      | 30.76                       | 3.68             |
| M-5 FPW                         | M-5    | 9                                            | 12/18/2015    | 43                    | 30.10     | 50.86      | 3               | 6.42  | 37.31                      | 26.96                       | 1.78             |
| M-5 FPW                         | M-5    | 56                                           | 2/3/2016      | 90                    | 63.00     | 159.9      | 4               | 6.21  | 29.11                      | 20.24                       | 0.43             |
| M-5 FPW                         | M-5    | 70                                           | 2/17/2016     | 104                   | 72.80     | 43.35      | 5               | 6.1   | 21.98                      | 28.5                        | 0.15             |
| M-5 FPW                         | M-5    | 119                                          | 4/6/2016      | 153                   | 107.10    | 41.96      | 5               | 6.27  | 26.69                      | 10.24                       | 1.16             |
| M-5 FPW                         | M-5    | 182                                          | 6/8/2016      | 216                   | 151.20    | 49.92      | 6               | 6.38  | 5.63                       | 6.18                        | 0.00             |
| M-5 FPW                         | M-5    | 280                                          | 9/14/2016     | 314                   | 219.80    | 50.2       | 6               | 6.25  | -1.2                       | -30.88                      | 0.00             |
| M-5 FPW                         | M-5    | 764                                          | 12/13/2017    | 798                   | 558.60    | NA         | 4               | 5.72  | 6.08                       | -7.99                       | -                |
| <b>UTICA SHALE</b>              |        |                                              |               |                       |           |            |                 |       |                            |                             |                  |
| SW Fresh Water Tank             | -      | N/A                                          | 5/7/2015      | N/A                   | 0.14903   | NA         | -               | 8.541 | -12.06                     | -28.62                      | -                |
| SW Fresh Water Tank             | -      | N/A                                          | 5/14/2015     | N/A                   | 0.16387   | NA         | -               | 7.68  | -9.88                      | -27.66                      | -                |
| SW Produced Water Additive      | -      | N/A                                          | 5/14/2015     | N/A                   | 127.82    | NA         | 7               | 6.323 | 4.52                       | -8.68                       | -                |

|                            |     |     |            |     |        |        |   |       |        |        |       |
|----------------------------|-----|-----|------------|-----|--------|--------|---|-------|--------|--------|-------|
| SW Produced Water Additive | -   | N/A | 5/29/2015  | N/A | 129.08 | NA     | 7 | 5.71  | 1.54   | 13.18  | -     |
| U-6 FPW                    | U-6 | 1   | 7/14/2015  | 38  | 89.88  | 83.3   | 5 | 6.588 | 4.36   | 27.8   | 0.103 |
| U-6 FPW                    | U-6 | 9   | 7/23/2015  | 46  | 109.27 | 64.06  | 6 | 6.33  | 9.72   | 16.78  | 0.067 |
| U-6 FPW                    | U-6 | 16  | 7/30/2015  | 54  | 113.54 | 60.74  | 6 | 6.36  | 5.42   | 13.12  | 0.192 |
| U-6 FPW                    | U-6 | 22  | 8/5/2015   | 60  | 117.6  | 83.82  | 6 | 6.32  | 21.87  | 12.31  | 0.531 |
| U-6 FPW                    | U-6 | 30  | 8/13/2015  | 68  | 119.42 | 59.78  | 7 | 6.28  | -24.87 | -28.63 | -     |
| U-6 FPW                    | U-6 | 58  | 9/10/2015  | 96  | 130.55 | 48.62  | 7 | 6.22  | -26.29 | -25.16 | -     |
| U-6 FPW                    | U-6 | 87  | 10/8/2015  | 124 | 86.8   | 36.62  | 5 | 3.97  | -26.17 | -18.53 | -     |
| U-6 FPW                    | U-6 | 122 | 11/12/2015 | 159 | 111.3  | 50.29  | 7 | 4.5   | -32.83 | -32.14 | -     |
| U-6 FPW                    | U-6 | 392 | 8/8/2016   | 460 | 322    | 22.904 | 7 | 5.31  | -18.05 | -51.79 | -     |
| U-7 FPW                    | U-7 | 1   | 7/14/2015  | 38  | 128.73 | 153.9  | 7 | 5.97  | -11.32 | -39.14 | -     |
| U-7 FPW                    | U-7 | 9   | 7/23/2015  | 46  | 114.03 | 80.76  | 6 | 6.32  | -19.73 | -29.64 | -     |
| U-7 FPW                    | U-7 | 16  | 7/30/2015  | 54  | 120.05 | 61.41  | 7 | 6.2   | -39.72 | -46.68 | -     |
| U-7 FPW                    | U-7 | 30  | 8/13/2015  | 68  | 128.66 | 51.96  | 7 | 6.2   | -47.79 | -57.31 | -     |
| U-7 FPW                    | U-7 | 58  | 9/10/2015  | 96  | 135.87 | 55.23  | 7 | 6.15  | -24.97 | -17.72 | -     |
| U-7 FPW                    | U-7 | 87  | 10/8/2015  | 124 | 86.8   | 36.2   | 7 | 5.58  | -26.58 | -25.18 | -     |
| U-7 FPW                    | U-7 | 122 | 11/12/2015 | 159 | 111.3  | 40.46  | 7 | 5.03  | -55.65 | -62.91 | -     |
| U-7 FPW                    | U-7 | 392 | 8/8/2016   | 460 | 322    | 22.8   | 7 | 5.54  | -59.28 | -53.92 | -     |

**Table S3.** NAC Thiol Reactivity Data

| Type of sample         | Well # | Approximate Time After Flowback Began (Days) | Sampling Date | Days after Fracturing | Concentration Factor | NAC-Thiol Assay: Response as the Mean Percent of the Negative Control (±SE) |
|------------------------|--------|----------------------------------------------|---------------|-----------------------|----------------------|-----------------------------------------------------------------------------|
| <b>MARCELLUS SHALE</b> |        |                                              |               |                       |                      |                                                                             |
| M-4 fracture fluid     | M-4    | NA                                           | 11/11/2015    | NA                    | 25                   | 85.81                                                                       |
| Input river            | M-4    | NA                                           | 11/11/2015    | NA                    | 200                  | 89.75                                                                       |
| M-4 FPW                | M-4    | 4                                            | 12/13/2015    | 27                    | 200                  | 82.98                                                                       |
| M-4 FPW                | M-4    | 13                                           | 12/22/2015    | 36                    | 200                  | 80.5                                                                        |
| M-4 FPW                | M-4    | 56                                           | 2/3/2016      | 79                    | 200                  | 77.63                                                                       |
| M-4 FPW                | M-4    | 70                                           | 2/17/2016     | 93                    | 200                  | 78.27                                                                       |
| M-4 FPW                | M-4    | 182                                          | 6/8/2016      | 205                   | 200                  | 77.79                                                                       |
| M-4 FPW                | M-4    | 280                                          | 9/14/2016     | 303                   | 200                  | 89.67                                                                       |
| M-4 FPW                | M-4    | 406                                          | 1/18/2017     | 429                   | 200                  | 80.04                                                                       |
| M-4 FPW                | M-4    | 490                                          | 4/12/2017     | 513                   | 200                  | 91.28                                                                       |
| M-4 FPW                | M-4    | 641                                          | 8/16/2017     | 664                   | 200                  | 91.65                                                                       |
| M-4 FPW                | M-4    | 764                                          | 12/13/2017    | 787                   | 200                  | 96.08                                                                       |
| M-5 fracture fluid     | M-5    | NA                                           | 11/5/2015     | NA                    | 25                   | 90.45                                                                       |
| Input river            | M-5    | NA                                           | 11/5/2015     | NA                    | 200                  | 90.65                                                                       |
| M-5 FPW                | M-5    | 9                                            | 12/18/2015    | 43                    | 200                  | 78.97                                                                       |
| M-5 FPW                | M-5    | 36                                           | 1/14/2016     | 70                    | 200                  | 87.31                                                                       |
| M-5 FPW                | M-5    | 56                                           | 2/3/2016      | 90                    | 200                  | 85.5                                                                        |
| M-5 FPW                | M-5    | 70                                           | 2/17/2016     | 104                   | 200                  | 86.46                                                                       |
| M-5 FPW                | M-5    | 119                                          | 4/6/2016      | 153                   | 200                  | 92.3                                                                        |
| M-5 FPW                | M-5    | 182                                          | 6/8/2016      | 216                   | 200                  | 77.6                                                                        |
| M-5 FPW                | M-5    | 280                                          | 9/14/2016     | 314                   | 200                  | 99.09                                                                       |
| M-5 FPW                | M-5    | 764                                          | 12/13/2017    | 798                   | 200                  | 94.47                                                                       |

**Table S4.** Hydraulic fracturing fluid composition details for M-4 well in Marcellus Shale

|                               |               |
|-------------------------------|---------------|
| Job Start Date                | 11/6/2015     |
| Job End Date                  | 11/15/2015    |
| State                         | West Virginia |
| County                        | Monongalia    |
| True Vertical Depth           | 7,483         |
| Total Base Water Volume (gal) | 10,647,966    |
| Total Base Non Water Volume   | 0             |

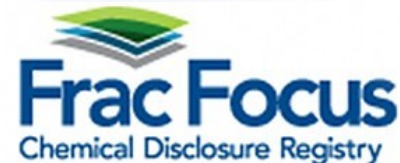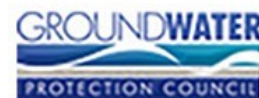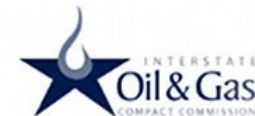

**Hydraulic Fracturing Fluid Composition:**

| Trade Name                                                                                                                                         | Supplier     | Purpose                                                                                                                                                | Ingredients                                                                       | Chemical Abstract Service Number (CAS #) | Maximum Ingredient Concentration in Additive (% by mass)** | Maximum Ingredient Concentration in HF Fluid (% by mass)** | Comments |
|----------------------------------------------------------------------------------------------------------------------------------------------------|--------------|--------------------------------------------------------------------------------------------------------------------------------------------------------|-----------------------------------------------------------------------------------|------------------------------------------|------------------------------------------------------------|------------------------------------------------------------|----------|
| Ingredients shown above are subject to 29 CFR 1910.1200(i) and appear on Material Safety Data Sheets (MSDS). Ingredients shown below are Non-MSDS. |              |                                                                                                                                                        |                                                                                   |                                          |                                                            |                                                            |          |
| Proppant Transport                                                                                                                                 | Schlumberger | Corrosion Inhibitor, Scale Inhibitor, Biocide, AntiFoam Agent, Acid, Breaker, Gelling Agent, Friction Reducer, Iron Control Agent, Fluid Loss Additive |                                                                                   |                                          |                                                            |                                                            |          |
|                                                                                                                                                    |              |                                                                                                                                                        | Water (Including Mix Water Supplied by Client)*                                   | NA                                       |                                                            | 87.63568                                                   |          |
|                                                                                                                                                    |              |                                                                                                                                                        | Quartz, Crystalline silica                                                        | 14808-60-7                               | 99.06784                                                   | 12.21724                                                   |          |
|                                                                                                                                                    |              |                                                                                                                                                        | Hydrochloric acid                                                                 | 7647-01-0                                | 0.66726                                                    | 0.08228                                                    |          |
|                                                                                                                                                    |              |                                                                                                                                                        | Ammonium sulfate                                                                  | 7783-20-2                                | 0.06845                                                    | 0.00844                                                    |          |
|                                                                                                                                                    |              |                                                                                                                                                        | Guar gum                                                                          | 9000-30-0                                | 0.05865                                                    | 0.00724                                                    |          |
|                                                                                                                                                    |              |                                                                                                                                                        | Acrylamide, 2-acrylamido-2-methylpropanesulfonic acid, sodium salt polymer        | 38193-60-1                               | 0.05052                                                    | 0.00623                                                    |          |
|                                                                                                                                                    |              |                                                                                                                                                        | Glutaraldehyde                                                                    | 111-30-8                                 | 0.02831                                                    | 0.00349                                                    |          |
|                                                                                                                                                    |              |                                                                                                                                                        | Ethanol, 2,2',2''-nitritoltris-, 1,1',1''-tris(dihydrogen phosphate), sodium salt | 68171-29-9                               | 0.00971                                                    | 0.00120                                                    |          |
|                                                                                                                                                    |              |                                                                                                                                                        | Diammonium peroxidisulphate                                                       | 7727-54-0                                | 0.00601                                                    | 0.00074                                                    |          |

|            |     |                    |                                                                                      |             |          |         |
|------------|-----|--------------------|--------------------------------------------------------------------------------------|-------------|----------|---------|
|            |     |                    | Polymer of 2-acrylamido-2-methylpropanesulfonic acid sodium salt and methyl acrylate | 136793-29-8 | 0.00541  | 0.00067 |
|            |     |                    | Alkyl(c12-16) dimethylbenzyl ammonium chloride                                       | 68424-85-1  | 0.00506  | 0.00062 |
|            |     |                    | Sodium erythorbate                                                                   | 6381-77-7   | 0.00436  | 0.00054 |
|            |     |                    | Trisodium ortho phosphate                                                            | 7601-54-9   | 0.00427  | 0.00053 |
|            |     |                    | Urea                                                                                 | 57-13-6     | 0.00332  | 0.00041 |
|            |     |                    | Polypropylene glycol                                                                 | 25322-69-4  | 0.00294  | 0.00036 |
|            |     |                    | Methanol                                                                             | 67-56-1     | 0.00252  | 0.00031 |
|            |     |                    | Fatty acids, tall-oil                                                                | 61790-12-3  | 0.00156  | 0.00019 |
|            |     |                    | Thiourea, polymer with formaldehyde and 1-phenylethanone                             | 68527-49-1  | 0.00129  | 0.00016 |
|            |     |                    | Ethylene Glycol                                                                      | 107-21-1    | 0.00121  | 0.00019 |
|            |     |                    | Non-crystalline silica (impurity)                                                    | 7631-86-9   | 0.00084  | 0.00010 |
|            |     |                    | Vinylidene chloride/methylacrylate copolymer                                         | 25038-72-6  | 0.00080  | 0.00010 |
|            |     |                    | Sodium sulfate                                                                       | 7757-82-6   | 0.00078  | 0.00010 |
|            |     |                    | Alcohols, C14-15, ethoxylated (7EO)                                                  | 68951-67-7  | 0.00061  | 0.00008 |
|            |     |                    | Ethanol                                                                              | 64-17-5     | 0.00061  | 0.00007 |
|            |     |                    | Propargyl alcohol                                                                    | 107-19-7    | 0.00041  | 0.00005 |
|            |     |                    | 2-Propenamid (impurity)                                                              | 79-06-1     | 0.00017  | 0.00002 |
|            |     |                    | Hexadec-1-ene                                                                        | 629-73-2    | 0.00014  | 0.00002 |
|            |     |                    | 1-Octadecene (C18)                                                                   | 112-88-9    | 0.00007  | 0.00001 |
|            |     |                    | Dimethyl siloxanes and silicones                                                     | 63148-62-9  | 0.00009  | 0.00001 |
|            |     |                    | Tetrasodium ethylenediaminetetraacetate                                              | 64-02-8     | 0.00009  | 0.00001 |
|            |     |                    | Dodecamethylcyclohexasiloxane                                                        | 540-97-6    |          |         |
|            |     |                    | Siloxanes and silicones, dimethyl, reaction products with silica                     | 67762-90-7  | 0.00001  |         |
|            |     |                    | Octamethylcyclotetrasiloxane                                                         | 556-67-2    |          |         |
|            |     |                    | poly(tetrafluoroethylene)                                                            | 9002-84-0   | 0.00001  |         |
|            |     |                    | Formaldehyde                                                                         | 50-00-0     | 0.00001  |         |
|            |     |                    | Copper(II) sulfate                                                                   | 7758-98-7   |          |         |
|            |     |                    | Decamethyl cyclopentasiloxane                                                        | 541-02-6    |          |         |
|            |     |                    | Magnesium silicate hydrate (talc)                                                    | 14807-96-6  | 0.00002  |         |
| FR Pro 150 | ECM | Friction Reduction |                                                                                      |             |          |         |
|            |     |                    | Water                                                                                | 7732-18-5   | 50.00000 | 0.01579 |
|            |     |                    | Polyacrylamide-co-acrylic acid                                                       | 9003-06-9   | 32.00000 | 0.01008 |
|            |     |                    | Sodium Chloride                                                                      | 7647-14-5   | 15.00000 | 0.00472 |
|            |     |                    | Alcohol Ethoxylate Surfactants                                                       | Trade       | 5.00000  | 0.00157 |
|            |     |                    | Petroleum Distillate                                                                 | 64742-47-8  | 25.00000 |         |

\* Total Water Volume sources may include fresh water, produced water, and/or recycled water

\*\* Information is based on the maximum potential for concentration and thus the total may be over 100%

Note: For Field Development Products (products that begin with FDP), MSDS level only information has been provided.

Ingredient information for chemicals subject to 29 CFR 1910.1200(i) and Appendix D are obtained from suppliers Material Safety Data Sheets (MSDS)

**Table S5.** Hydraulic fracturing fluid composition details for M-5 well in Marcellus Shale

|                               |               |
|-------------------------------|---------------|
| Job Start Date                | 10/28/2015    |
| Job End Date                  | 11/5/2015     |
| State                         | West Virginia |
| County                        | Monongalia    |
| True Vertical Depth           | 7,530         |
| Total Base Water Volume (gal) | 9,961,350     |
| Total Base Non Water Volume   | 0             |

**Hydraulic Fracturing Fluid Composition:**

| Trade Name                                                                                                                                         | Supplier     | Purpose                                                                                                                                                 | Ingredients                                                                          | Chemical Abstract Service Number (CAS #) | Maximum Ingredient Concentration in Additive (% by mass)** | Maximum Ingredient Concentration in HF Fluid (% by mass)** | Comments |
|----------------------------------------------------------------------------------------------------------------------------------------------------|--------------|---------------------------------------------------------------------------------------------------------------------------------------------------------|--------------------------------------------------------------------------------------|------------------------------------------|------------------------------------------------------------|------------------------------------------------------------|----------|
| Ingredients shown above are subject to 29 CFR 1910.1200(i) and appear on Material Safety Data Sheets (MSDS). Ingredients shown below are Non-MSDS. |              |                                                                                                                                                         |                                                                                      |                                          |                                                            |                                                            |          |
| Proppant Transport                                                                                                                                 | Schlumberger | Corrosion Inhibitor, Scale Inhibitor, Biocide, Acid, Breaker, Gelling Agent, Friction Reducer, Iron Control Agent, Fluid Loss Additive , Propping Agent |                                                                                      |                                          |                                                            |                                                            |          |
|                                                                                                                                                    |              |                                                                                                                                                         | Water (Including Mix Water Supplied by Client)*                                      | NA                                       |                                                            | 87.58016                                                   |          |
|                                                                                                                                                    |              |                                                                                                                                                         | Quartz, Crystalline silica                                                           | 14808-60-7                               | 98.77034                                                   | 12.26228                                                   |          |
|                                                                                                                                                    |              |                                                                                                                                                         | Hydrochloric acid                                                                    | 7647-01-0                                | 0.90409                                                    | 0.11223                                                    |          |
|                                                                                                                                                    |              |                                                                                                                                                         | Ammonium sulfate                                                                     | 7783-20-2                                | 0.12127                                                    | 0.01506                                                    |          |
|                                                                                                                                                    |              |                                                                                                                                                         | Acrylamide, 2-acrylamido-2-methylpropanesulfonic acid, sodium salt polymer           | 38193-60-1                               | 0.08951                                                    | 0.01111                                                    |          |
|                                                                                                                                                    |              |                                                                                                                                                         | Glutaraldehyde                                                                       | 111-30-8                                 | 0.03083                                                    | 0.00383                                                    |          |
|                                                                                                                                                    |              |                                                                                                                                                         | Guar gum                                                                             | 9000-30-0                                | 0.02213                                                    | 0.00275                                                    |          |
|                                                                                                                                                    |              |                                                                                                                                                         | Polymer of 2-acrylamido-2-methylpropanesulfonic acid sodium salt and methyl acrylate | 136793-29-8                              | 0.00959                                                    | 0.00119                                                    |          |



|            |     |                    |                                                                                |            |          |         |
|------------|-----|--------------------|--------------------------------------------------------------------------------|------------|----------|---------|
|            |     |                    | Ethanol, 2,2',2''-nitrotris-, 1,1',1''-tris(dihydrogen phosphate), sodium salt | 68171-29-9 | 0.00943  | 0.00117 |
|            |     |                    | Sodium erythorbate                                                             | 6381-77-7  | 0.00589  | 0.00073 |
|            |     |                    | Urea                                                                           | 57-13-6    | 0.00589  | 0.00073 |
|            |     |                    | Alkyl(c12-16) dimethylbenzyl ammonium chloride                                 | 68424-85-1 | 0.00551  | 0.00068 |
|            |     |                    | Trisodium ortho phosphate                                                      | 7601-54-9  | 0.00415  | 0.00051 |
|            |     |                    | Methanol                                                                       | 67-56-1    | 0.00332  | 0.00041 |
|            |     |                    | Fatty acids, tall-oil                                                          | 61790-12-3 | 0.00210  | 0.00026 |
|            |     |                    | Thiourea, polymer with formaldehyde and 1-phenylethanone                       | 68527-49-1 | 0.00174  | 0.00022 |
|            |     |                    | Sodium sulfate                                                                 | 7757-82-6  | 0.00137  | 0.00017 |
|            |     |                    | Non-crystalline silica (impurity)                                              | 7631-86-9  | 0.00128  | 0.00016 |
|            |     |                    | Ethylene Glycol                                                                | 107-21-1   | 0.00118  | 0.00015 |
|            |     |                    | Alcohols, C14-15, ethoxylated (7EO)                                            | 68951-67-7 | 0.00082  | 0.00010 |
|            |     |                    | Ethanol                                                                        | 64-17-5    | 0.00066  | 0.00008 |
|            |     |                    | Propargyl alcohol                                                              | 107-19-7   | 0.00055  | 0.00007 |
|            |     |                    | 2-Propenamid (impurity)                                                        | 79-06-1    | 0.00029  | 0.00004 |
|            |     |                    | Hexadec-1-ene                                                                  | 629-73-2   | 0.00018  | 0.00002 |
|            |     |                    | Tetrasodium ethylenediaminetetraacetate                                        | 64-02-8    | 0.00015  | 0.00002 |
|            |     |                    | Diammonium peroxidisulphate                                                    | 7727-54-0  | 0.00008  | 0.00001 |
|            |     |                    | 1-Octadecene (C18)                                                             | 112-88-9   | 0.00009  | 0.00001 |
|            |     |                    | Dimethyl siloxanes and silicones                                               | 63148-62-9 | 0.00008  | 0.00001 |
|            |     |                    | Decamethyl cyclopentasiloxane                                                  | 541-02-6   | 0.00001  |         |
|            |     |                    | Siloxanes and silicones, dimethyl, reaction products with silica               | 67762-90-7 | 0.00001  |         |
|            |     |                    | Octamethylcyclotetrasiloxane                                                   | 556-67-2   | 0.00001  |         |
|            |     |                    | Formaldehyde                                                                   | 50-00-0    | 0.00001  |         |
|            |     |                    | Dodecamethylcyclohexasiloxane                                                  | 540-97-6   |          |         |
|            |     |                    | Copper(II) sulfate                                                             | 7758-98-7  |          |         |
| FR Pro 150 | ECM | Friction Reduction |                                                                                |            |          |         |
|            |     |                    | Water                                                                          | 7732-18-5  | 50.00000 | 0.00240 |
|            |     |                    | Polyacrylamide-co-acrylic acid                                                 | 9003-06-9  | 32.00000 | 0.00154 |
|            |     |                    | Sodium Chloride                                                                | 7647-14-5  | 15.00000 | 0.00072 |
|            |     |                    | Alcohol Ethoxylate Surfactants                                                 | Trade      | 5.00000  | 0.00024 |
|            |     |                    | Hydrotreated Petroleum Distillate                                              | 64742-47-8 | 25.00000 |         |

\* Total Water Volume sources may include fresh water, produced water, and/or recycled water

\*\* Information is based on the maximum potential for concentration and thus the total may be over 100%

Note: For Field Development Products (products that begin with FDP), MSDS level only information has been provided.

Ingredient information for chemicals subject to 29 CFR 1910.1200(i) and Appendix D are obtained from suppliers Material Safety Data Sheets (MSDS)

**Table S6.** Hydraulic fracturing fluid composition details for U-6 well in the Utica-Point Pleasant Formation

|                               |           |
|-------------------------------|-----------|
| Job Start Date                | 4/30/2015 |
| Job End Date                  | 5/30/2015 |
| State                         | Ohio      |
| County                        | Monroe    |
| True Vertical Depth           | 9,619     |
| Total Base Water Volume (gal) | 7,519,974 |
| Total Base Non Water Volume   | 0         |

**Hydraulic Fracturing Fluid Composition:**

| Trade Name    | Supplier           | Purpose          | Ingredients                                                                                    | Chemical Abstract Service Number (CAS #) | Maximum Ingredient Concentration in Additive (% by mass)** | Maximum Ingredient Concentration in HF Fluid (% by mass)** | Comments |
|---------------|--------------------|------------------|------------------------------------------------------------------------------------------------|------------------------------------------|------------------------------------------------------------|------------------------------------------------------------|----------|
| Fresh water   | Stingray           | Carrier          |                                                                                                |                                          |                                                            |                                                            |          |
|               |                    |                  | Water                                                                                          | 7732-18-5                                | 100.00000                                                  | 87.27337                                                   |          |
| 40/70 White   | Steubenville/Cadiz | Proppant         |                                                                                                |                                          |                                                            |                                                            |          |
|               |                    |                  | Sand                                                                                           | 14808-60-7                               | 100.00000                                                  | 11.93720                                                   |          |
| Muriatic Acid | Axiall, LLC        | Acid             |                                                                                                |                                          |                                                            |                                                            |          |
|               |                    |                  | Water                                                                                          | 7732-18-5                                | 60.00000                                                   | 0.21773                                                    |          |
|               |                    |                  | Hydrogen chloride                                                                              | 7647-01-0                                | 40.00000                                                   | 0.14516                                                    |          |
| 100 mesh      | Minerva/Cadiz      | Proppant         |                                                                                                |                                          |                                                            |                                                            |          |
|               |                    |                  | Sand                                                                                           | 14808-60-7                               | 100.00000                                                  | 0.23238                                                    |          |
| FRA 409       | Weatherford        | Friction Reducer |                                                                                                |                                          |                                                            |                                                            |          |
|               |                    |                  | Ethanaminium, N,N,N-trimethyl-2-[(1-oxo-2-propenyl)oxy]-, chloride, polymer with 2-propenamide | 69418-26-4                               | 70.00000                                                   | 0.07463                                                    |          |
|               |                    |                  | Proprietary                                                                                    | Proprietary                              | 30.00000                                                   | 0.03198                                                    |          |
|               |                    |                  | Petroleum Distillate                                                                           | 64742-47-8                               | 10.00000                                                   | 0.01066                                                    |          |
|               |                    |                  | Alcohols, C12-14-secondary, ethoxylated                                                        | 84133-50-6                               | 5.00000                                                    | 0.00533                                                    |          |
|               |                    |                  | Adipic acid                                                                                    | 124-04-9                                 | 3.00000                                                    | 0.00320                                                    |          |
| B-84          | X-Chem, LLC        | Biocide          |                                                                                                |                                          |                                                            |                                                            |          |
|               |                    |                  | Water                                                                                          | 7732-18-5                                | 55.50000                                                   | 0.01738                                                    |          |

|                 |                 |                     |                                           |             |          |         |
|-----------------|-----------------|---------------------|-------------------------------------------|-------------|----------|---------|
|                 |                 |                     | Glutaraldehyde                            | 111-30-8    | 27.00000 | 0.00846 |
|                 |                 |                     | Didecyl dimethyl ammonium chloride        | 7173-51-5   | 8.00000  | 0.00251 |
|                 |                 |                     | n-Alkyl dimethyl benzyl ammonium chloride | 68424-85-1  | 5.50000  | 0.00172 |
|                 |                 |                     | Ethanol                                   | 64-17-5     | 4.00000  | 0.00125 |
| VBL-29          | X-Chem, LLC     | Breaker             |                                           |             |          |         |
|                 |                 |                     | Water                                     | 7732-18-5   | 90.00000 | 0.02785 |
|                 |                 |                     | Hydrogen Peroxide                         | 7722-84-1   | 10.00000 | 0.00309 |
| Plexgel 907L-EB | Chemplex SOLVAY | Viscosifier         |                                           |             |          |         |
|                 |                 |                     | Guar Gum                                  | 9000-30-0   | 50.00000 | 0.00638 |
|                 |                 |                     | Distillate(petroleum), hydrotreated light | 64742-47-8  | 50.00000 | 0.00638 |
|                 |                 |                     | Organophylic Clay                         | Proprietary | 2.00000  | 0.00026 |
|                 |                 |                     | Alcohol ethoxylate                        | 34398-01-1  | 0.99000  | 0.00013 |
|                 |                 |                     | Cyrstalline Silica                        | 14808-60-7  | 0.06000  | 0.00001 |
| SC-30           | X-Chem, LLC     | Scale Inhibitor     |                                           |             |          |         |
|                 |                 |                     | Water                                     | 7732-18-5   | 70.00000 | 0.00729 |
|                 |                 |                     | Sodium Polyacrylate                       | Proprietary | 30.00000 | 0.00312 |
| TCA 6038F       | X-Chem, LLC     | Corrosion Inhibitor |                                           |             |          |         |
|                 |                 |                     | Water                                     | 7732-18-5   | 80.00000 | 0.00169 |
|                 |                 |                     | Methanol                                  | 67-56-1     | 20.00000 | 0.00042 |

Ingredients shown above are subject to 29 CFR 1910.1200(i) and appear on Material Safety Data Sheets (MSDS). Ingredients shown below are Non-MSDS.

\* Total Water Volume sources may include fresh water, produced water, and/or recycled water

\*\* Information is based on the maximum potential for concentration and thus the total may be over 100%

Note: For Field Development Products (products that begin with FDP), MSDS level only information has been provided.

Ingredient information for chemicals subject to 29 CFR 1910.1200(i) and Appendix D are obtained from suppliers Material Safety Data Sheets (MSDS)

**Table S7.** Hydraulic fracturing fluid composition details for U-7 well in the Utica-Point Pleasant Formation

|                               |           |
|-------------------------------|-----------|
| Job Start Date                | 4/30/2015 |
| Job End Date                  | 5/30/2015 |
| State                         | Ohio      |
| County                        | Monroe    |
| True Vertical Depth           | 9,643     |
| Total Base Water Volume (gal) | 7,485,366 |
| Total Base Non Water Volume   | 0         |

**Hydraulic Fracturing Fluid Composition:**

| Trade Name    | Supplier           | Purpose          | Ingredients                                                                                    | Chemical Abstract Service Number (CAS #) | Maximum Ingredient Concentration in Additive (% by mass)** | Maximum Ingredient Concentration in HF Fluid (% by mass)** | Comments |
|---------------|--------------------|------------------|------------------------------------------------------------------------------------------------|------------------------------------------|------------------------------------------------------------|------------------------------------------------------------|----------|
| Fresh water   | Stingray           | Carrier          | Water                                                                                          | 7732-18-5                                | 100.00000                                                  | 87.34324                                                   |          |
| 40/70 White   | Steubenville/Cadiz | Proppant         | Sand                                                                                           | 14808-60-7                               | 100.00000                                                  | 11.90548                                                   |          |
| Muriatic Acid | Axiall, LLC        | Acid             | Water                                                                                          | 7732-18-5                                | 60.00000                                                   | 0.19527                                                    |          |
|               |                    |                  | Hydrogen chloride                                                                              | 7647-01-0                                | 40.00000                                                   | 0.13018                                                    |          |
| 100 mesh      | Minerva/Cadiz      | Proppant         | Sand                                                                                           | 14808-60-7                               | 100.00000                                                  | 0.23254                                                    |          |
| FRA 409       | Weatherford        | Friction Reducer | Ethanaminium, N,N,N-trimethyl-2-[(1-oxo-2-propenyl)oxy]-, chloride, polymer with 2-propenamide | 69418-26-4                               | 70.00000                                                   | 0.07695                                                    |          |
|               |                    |                  | Proprietary                                                                                    | Proprietary                              | 30.00000                                                   | 0.03298                                                    |          |
|               |                    |                  | Petroleum Distillate                                                                           | 64742-47-8                               | 10.00000                                                   | 0.01099                                                    |          |
|               |                    |                  | Alcohols, C12-14-secondary, ethoxylated                                                        | 84133-50-6                               | 5.00000                                                    | 0.00550                                                    |          |
|               |                    |                  | Adipic acid                                                                                    | 124-04-9                                 | 3.00000                                                    | 0.00330                                                    |          |
| B-84          | X-Chem, LLC        | Biocide          | Water                                                                                          | 7732-18-5                                | 55.50000                                                   | 0.01766                                                    |          |

|                 |                 |                     |                                           |             |          |         |
|-----------------|-----------------|---------------------|-------------------------------------------|-------------|----------|---------|
|                 |                 |                     | Glutaraldehyde                            | 111-30-8    | 27.00000 | 0.00859 |
|                 |                 |                     | Didecyl dimethyl ammonium chloride        | 7173-51-5   | 8.00000  | 0.00255 |
|                 |                 |                     | n-Alkyl dimethyl benzyl ammonium chloride | 68424-85-1  | 5.50000  | 0.00175 |
|                 |                 |                     | Ethanol                                   | 64-17-5     | 4.00000  | 0.00127 |
| VBL-29          | X-Chem, LLC     | Breaker             |                                           |             |          |         |
|                 |                 |                     | Water                                     | 7732-18-5   | 90.00000 | 0.02733 |
|                 |                 |                     | Hydrogen Peroxide                         | 7722-84-1   | 10.00000 | 0.00304 |
| SC-30           | X-Chem, LLC     | Scale Inhibitor     |                                           |             |          |         |
|                 |                 |                     | Water                                     | 7732-18-5   | 70.00000 | 0.00771 |
|                 |                 |                     | Sodium Polyacrylate                       | Proprietary | 30.00000 | 0.00330 |
| Plexgel 907L-EB | Chemplex SOLVAY | Viscosifier         |                                           |             |          |         |
|                 |                 |                     | Guar Gum                                  | 9000-30-0   | 50.00000 | 0.00435 |
|                 |                 |                     | Distillate(petroleum), hydrotreated light | 64742-47-8  | 50.00000 | 0.00435 |
|                 |                 |                     | Organophylic Clay                         | Proprietary | 2.00000  | 0.00017 |
|                 |                 |                     | Alcohol ethoxylate                        | 34398-01-1  | 0.99000  | 0.00009 |
|                 |                 |                     | Crystalline Silica                        | 14808-60-7  | 0.06000  | 0.00001 |
| TCA 6038F       | X-Chem, LLC     | Corrosion Inhibitor |                                           |             |          |         |
|                 |                 |                     | Water                                     | 7732-18-5   | 80.00000 | 0.00117 |
|                 |                 |                     | Methanol                                  | 67-56-1     | 20.00000 | 0.00029 |

Ingredients shown above are subject to 29 CFR 1910.1200(i) and appear on Material Safety Data Sheets (MSDS). Ingredients shown below are Non-MSDS.

\* Total Water Volume sources may include fresh water, produced water, and/or recycled water

\*\* Information is based on the maximum potential for concentration and thus the total may be over 100%

Note: For Field Development Products (products that begin with FDP), MSDS level only information has been provided.

Ingredient information for chemicals subject to 29 CFR 1910.1200(i) and Appendix D are obtained from suppliers Material Safety Data Sheets (MSDS)

Table S8. Organic Chemistry Data

| Type of sample         | Well # | Approximate Time After Flowback Began (Days) | Sampling Date | Benzene (µg/L) | Toluene (µg/L) | Ethylbenzene (µg/L) | Xylene t (µg/L) | m,p-xylene (µg/L) | o-Xylene (µg/L) | MBAS (mg/L) | O&G (mg/L) |
|------------------------|--------|----------------------------------------------|---------------|----------------|----------------|---------------------|-----------------|-------------------|-----------------|-------------|------------|
| <b>MARCELLUS SHALE</b> |        |                                              |               |                |                |                     |                 |                   |                 |             |            |
| M-4 FPW                | M-4    | 1                                            | 12/10/2015    | 3              | 7.2            | 0.34                | 5               | 4                 | 1.1             | 0.08        | 4          |
| M-4 FPW                | M-4    | 13                                           | 12/22/2015    | 2.2            | 2.7            | 0.11                | 1.2             | 0.71              | 0.53            | 0.48        | 36         |
| M-4 FPW                | M-4    | 42                                           | 1/20/2016     | 10             | 13             | 1.1                 | 3.2             | 2.1               | 2.3             | 0.38        | 32         |
| M-4 FPW                | M-4    | 56                                           | 2/3/2016      | 12             | 10             | 11                  | 31              | 20                | 10.5            | 0.55        | 88         |
| M-4 FPW                | M-4    | 133                                          | 4/20/2016     | 2.8            | 3.4            | 0.11                | 1               | 0.62              | 0.41            | 0.91        | 2          |
| M-4 FPW                | M-4    | 206                                          | 7/2/2016      | 1.4            | 1.6            | 0                   | 0.31            | 0.2               | 0.11            | 0.38        | 250        |
| M-4 FPW                | M-4    | 287                                          | 9/21/2016     | 9.3            | 13             | 0.56                | 3               | 1.6               | 1.3             | 0.53        | 8          |
| M-4 FPW                | M-4    | 401                                          | 1/13/2017     | 2.1            | 2.3            | 0.11                | 0.31            | 0.2               | 0.11            | 0.84        | 2          |
| M-4 FPW                | M-4    | 485                                          | 4/7/2017      | 1.2            | 0.98           | 0.11                | 0.31            | 0.2               | 0.11            | 1.5         | 1          |
| M-4 FPW                | M-4    | 675                                          | 9/20/2017     | 0.67           | 0.37           | 0.2                 | 0.65            | 0.49              | 0.18            | 1.2         | 2          |
| M-4 FPW                | M-4    | 771                                          | 12/20/2017    | 0.15           | 0.37           | 0.2                 | 0.65            | 0.49              | 0.18            | 0.11        | 1          |
| M-5 FPW                | M-5    | 1                                            | 12/10/2015    | 4.3            | 18             | 1.4                 | 16              | 12                | 4               | 0.56        | 41         |
| M-5 FPW                | M-5    | 8                                            | 12/17/2015    | 14             | 22             | 1.1                 | 13              | 8.1               | 4.7             | 0.34        | 140        |
| M-5 FPW                | M-5    | 13                                           | 12/22/2015    | 12             | 10             | 11                  | 31              | 20                | 10.5            | 0.22        | 41         |
| M-5 FPW                | M-5    | 42                                           | 1/20/2016     | 27             | 53             | 4                   | 23              | 14                | 9.2             | 0.26        | 28         |
| M-5 FPW                | M-5    | 56                                           | 2/3/2016      | 12             | 10             | 11                  | 31              | 20                | 10.5            | 0.27        | 500        |
| M-5 FPW                | M-5    | 133                                          | 4/20/2016     | 5.6            | 12             | 1.1                 | 10              | 7.2               | 3.2             | 0.88        | 4          |
| M-5 FPW                | M-5    | 203                                          | 6/29/2016     | 8.8            | 15             | 0.83                | 3.6             | 2.1               | 1.6             | 0.89        | 12         |
| M-5 FPW                | M-5    | 287                                          | 9/21/2016     | 1.4            | 3.2            | 0.5                 | 0.85            | 0.46              | 0.39            | 0.67        | 190        |
| M-5 FPW                | M-5    | 402                                          | 2/14/2017     | 2.2            | 7              | 0.48                | 2.1             | 1.4               | 0.72            | 3           | 16         |
| M-5 FPW                | M-5    | 771                                          | 12/20/2017    | 1.7            | 1.5            | 0.2                 | 0.65            | 0.49              | 0.18            | 0.02        | 7          |

**Table S9.** Iodinated Organic Ions Data

| Type of sample         | Well # | Approximate Time After Flowback Began (Days) | Sampling Date | Number of Iodinated Ions | cumulative iodinated intensity |
|------------------------|--------|----------------------------------------------|---------------|--------------------------|--------------------------------|
| <b>MARCELLUS SHALE</b> |        |                                              |               |                          |                                |
| M-4 FPW                | M-4    | 1                                            | 12/10/2015    | 24                       | 365771652                      |
| M-4 FPW                | M-4    | 2                                            | 12/11/2015    | 4                        | 53009405                       |
| M-4 FPW                | M-4    | 3                                            | 12/12/2015    | 23                       | 247156272                      |
| M-4 FPW                | M-4    | 4                                            | 12/13/2015    | 25                       | 335868550                      |
| M-4 FPW                | M-4    | 7                                            | 12/16/2015    | 9                        | 84575542                       |
| M-4 FPW                | M-4    | 32                                           | 1/10/2016     | 55                       | 1589292678                     |
| M-4 FPW                | M-4    | 52                                           | 1/30/2016     | 54                       | 1232849252                     |
| M-4 FPW                | M-4    | 66                                           | 2/13/2016     | 42                       | 701786850                      |
| M-4 FPW                | M-4    | 80                                           | 2/27/2016     | 47                       | 1131320476                     |
| M-4 FPW                | M-4    | 115                                          | 4/2/2016      | 34                       | 449540466                      |
| M-4 FPW                | M-4    | 178                                          | 6/4/2016      | 21                       | 249839235                      |
| M-4 FPW                | M-4    | 213                                          | 7/9/2016      | 59                       | 1536697731                     |
| M-4 FPW                | M-4    | 276                                          | 9/10/2016     | 28                       | 176118846                      |
| M-5 FPW                | M-5    | 1                                            | 12/10/2015    | 38                       | 655626375                      |
| M-5 FPW                | M-5    | 5                                            | 12/14/2015    | 12                       | 202148089                      |
| M-5 FPW                | M-5    | 27                                           | 1/5/2016      | 27                       | 412030329                      |
| M-5 FPW                | M-5    | 47                                           | 1/25/2016     | 36                       | 565581406                      |
| M-5 FPW                | M-5    | 61                                           | 2/8/2016      | 31                       | 508076506                      |
| M-5 FPW                | M-5    | 110                                          | 3/28/2016     | 43                       | 759333756                      |
| M-5 FPW                | M-5    | 271                                          | 9/5/2016      | 34                       | 462125872                      |

Data from J. L. Luek, M. Harir, P. Schmitt-Kopplin, P. J. Mouser and M. Gonsior, Temporal dynamics of halogenated organic compounds in Marcellus Shale flowback, *Water research*, 2018, **136**, 200-206.

## II. Supporting Figures

Figure S1. Experimental factors considered in this paper.

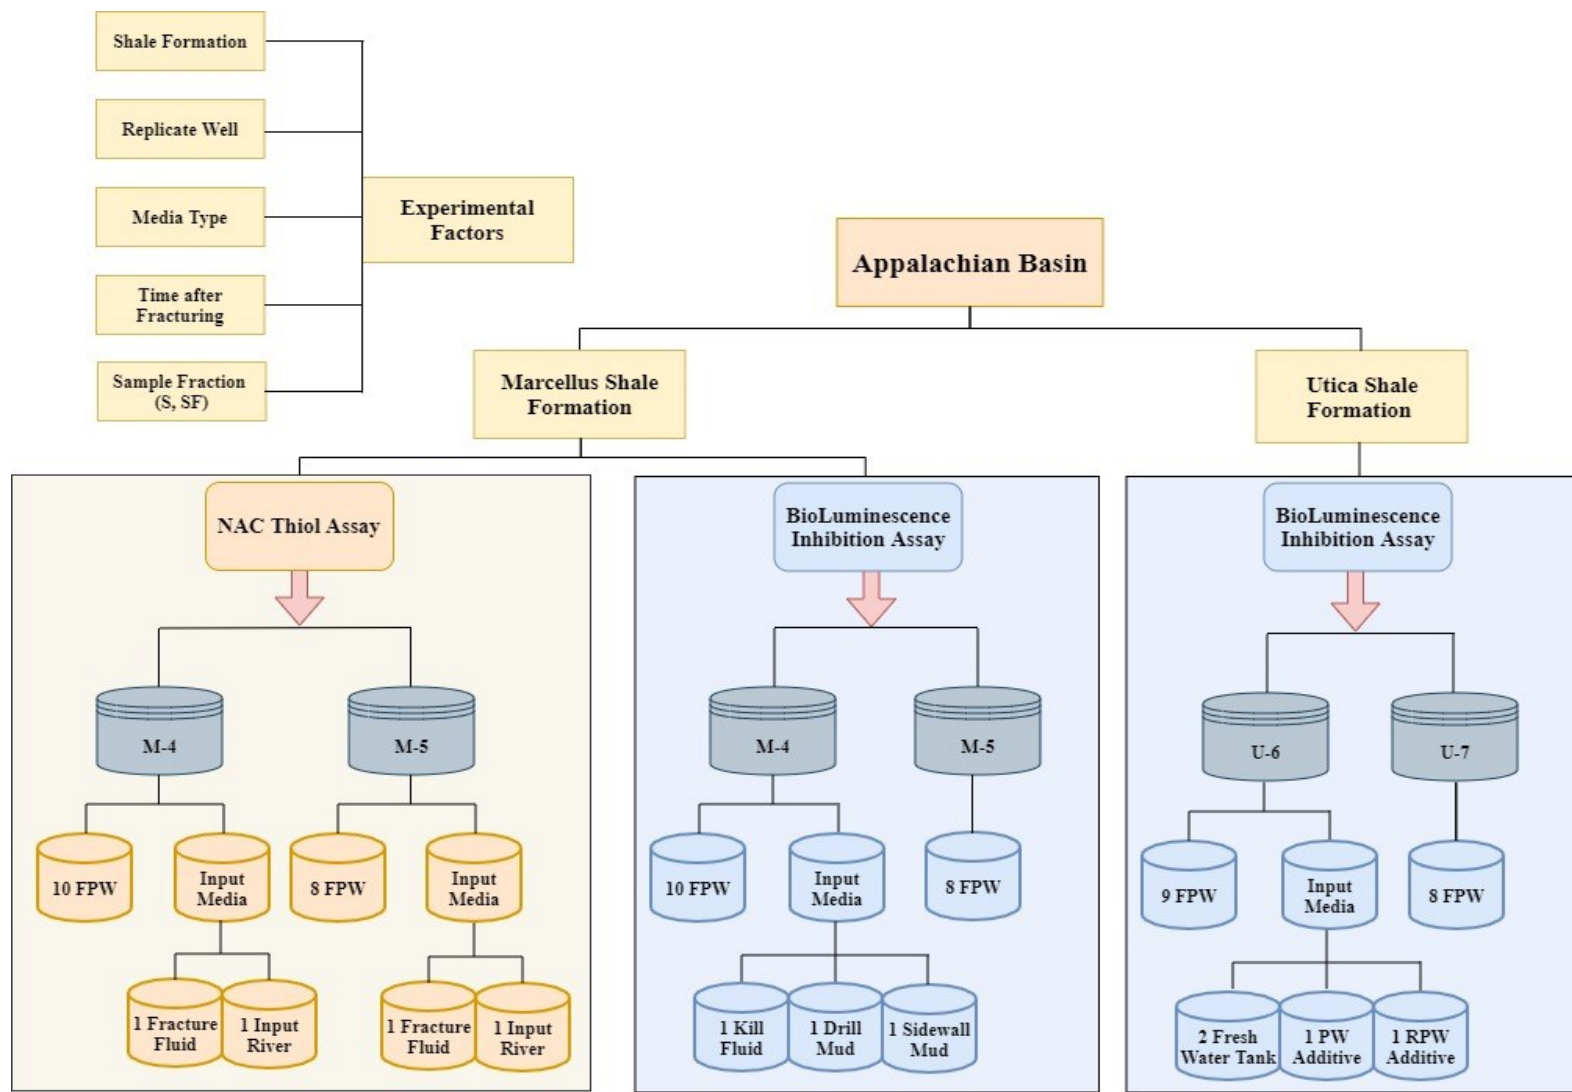



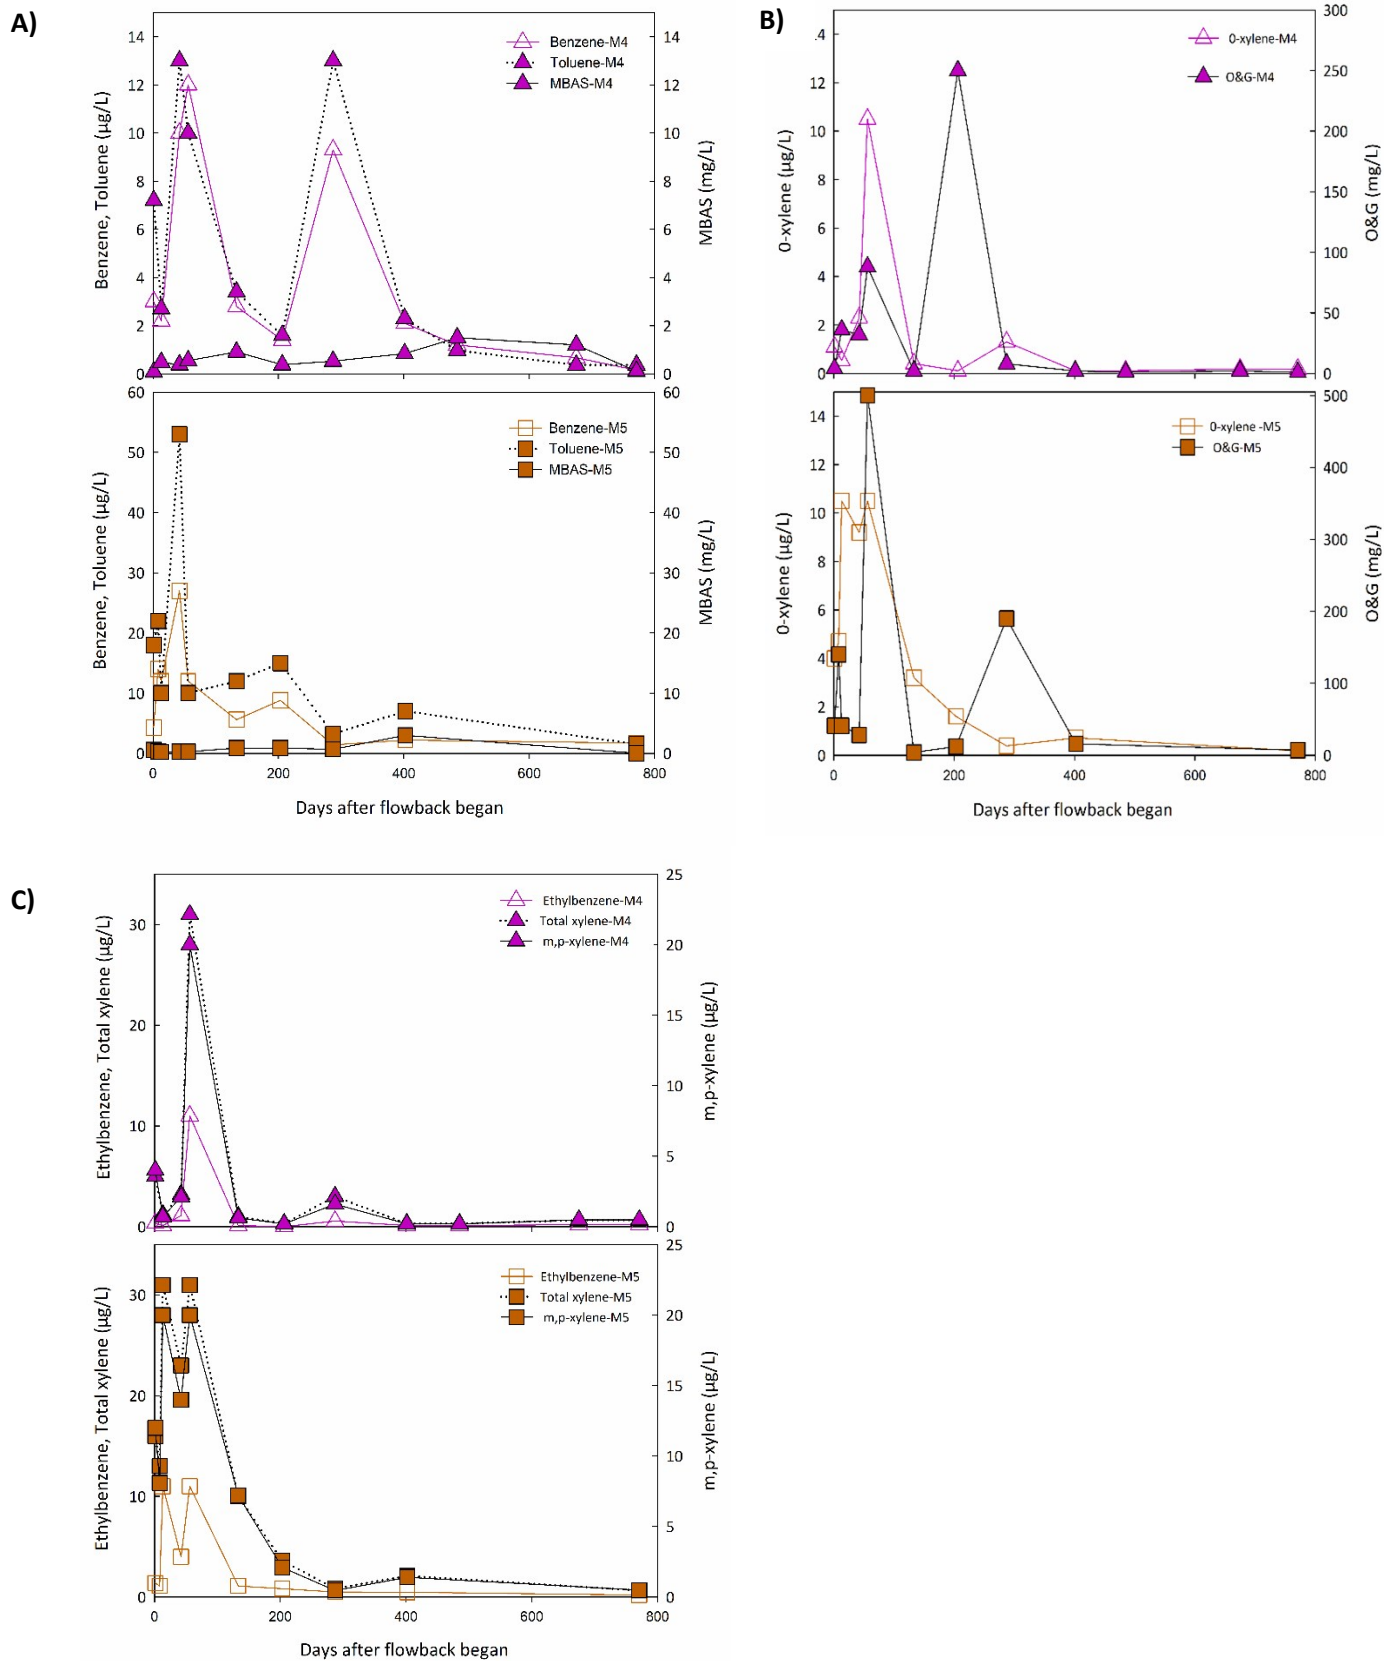

**Figure S2.**

(A) Benzene, Toluene and MBAS trends, (days 1-771) (B) o-xylene and O&G trends, (days 1-771) and (C) Ethylbenzene, total xylene and m,p-xylene trends in Marcellus shale formation, (days 1-771).
